# Supplementary material for: Novel photoactivation and solar-light-driven thermocatalysis on ε-MnO2 nanosheets lead to highly efficient catalytic abatement of ethyl acetate without acetaldehyde as unfavorable by-product
Source: Royal Society of Chemistry journal article supplement (doi:10.1039/c8ta04274h), 2018-01-01
Supplement: c8ta04274h1.pdf [file c8ta04274h1.pdf]

## Supporting information

### Novel photoactivation and solar-light-driven thermocatalysis on $\epsilon$ - $\text{MnO}_2$ nanosheets lead to highly efficient catalytic abatement of ethyl acetate without acetaldehyde as unfavorable by-product

Yi Yang, Yuanzhi Li\*, Qian Zhang, Min Zeng, Shaowen Wu, Lan Lan, Xiujuan Zhao

State Key Laboratory of Silicate Materials for Architectures, Wuhan University of Technology, 122

Luoshi Road, Wuhan 430070, P. R. China. Email: liyuanzhi66@hotmail.com

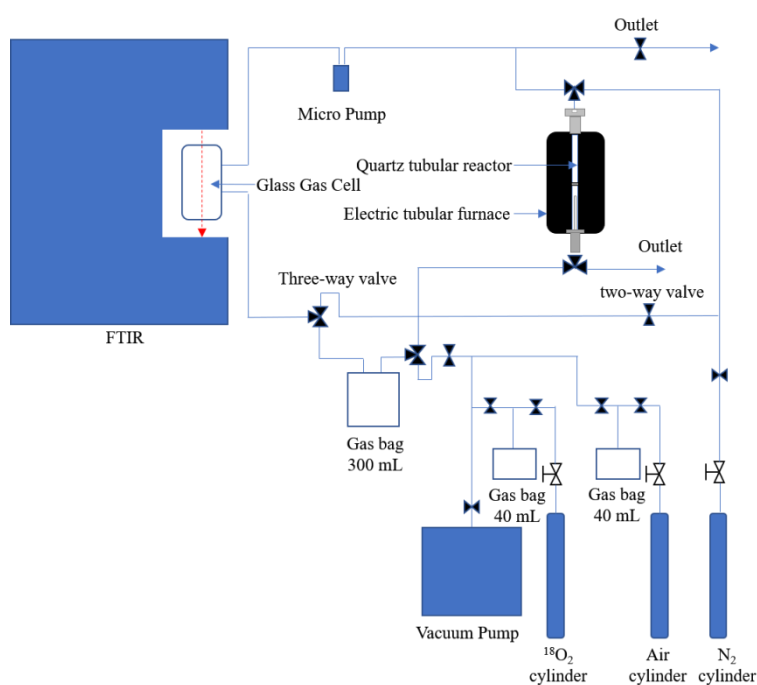

**Scheme S1.** The Set-up for the isotope labelling experiment by monitored the  $^{18}\text{O}_2$  or  $^{16}\text{O}_2$  reacted with ethyl acetate ( $^{12}\text{C}_4\text{H}_8^{16}\text{O}_2$ ) on the  $\epsilon$ - $\text{MnO}_2$  by FTIR.

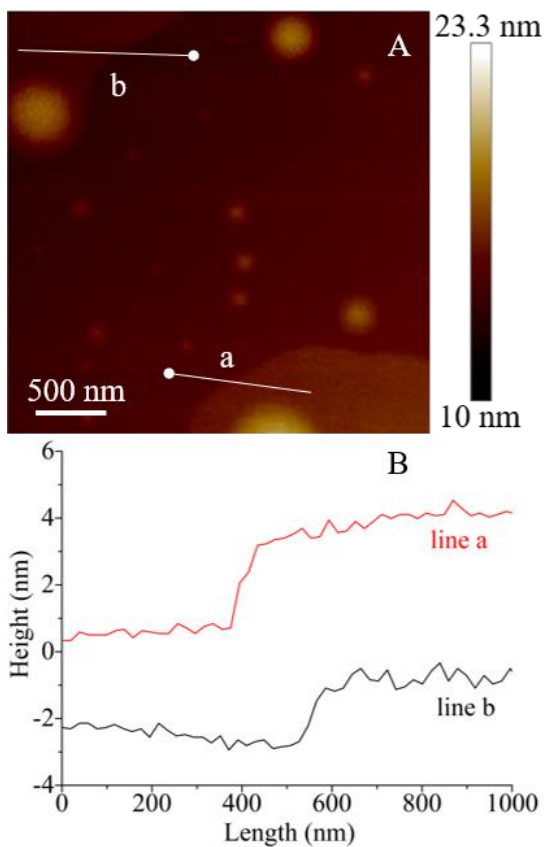

**Figure S1.** AFM image (A) and height-length contour (B) across the white lines of the  $\epsilon$ -MnO<sub>2</sub> sample.

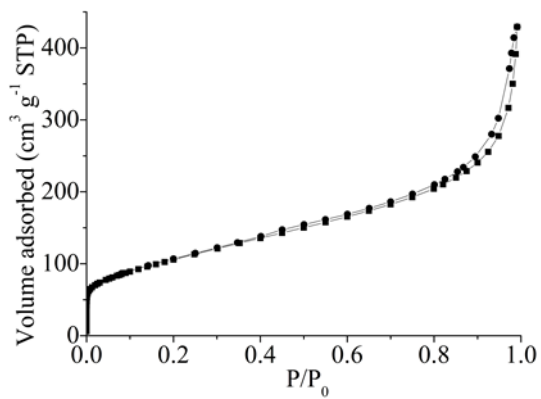

**Figure S2.** N<sub>2</sub> adsorption-desorption of the  $\epsilon$ -MnO<sub>2</sub> sample.

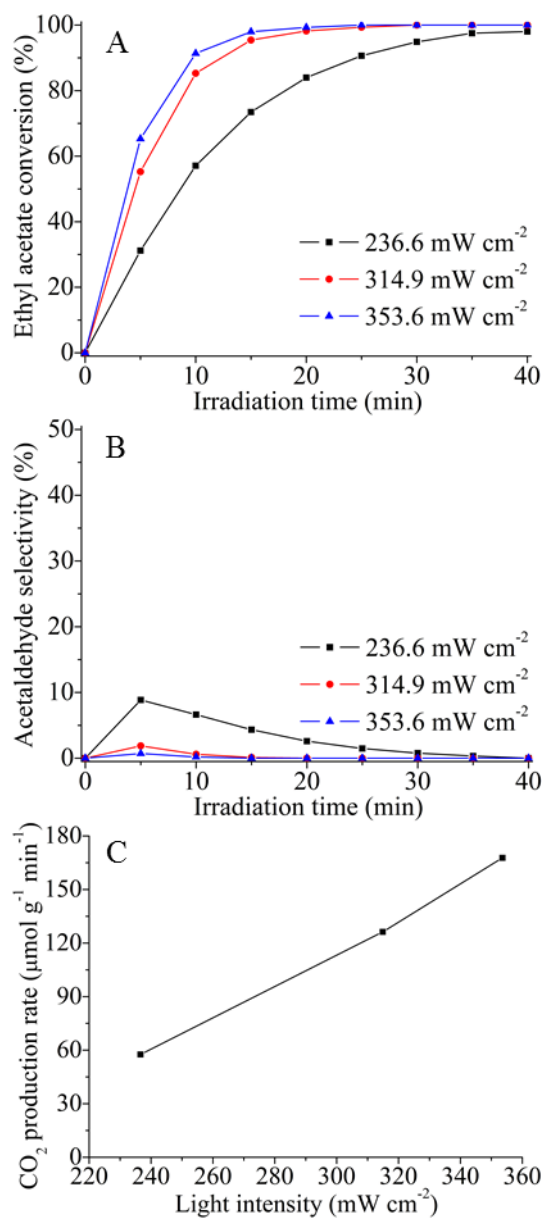

**Figure S3.** The time course of ethyl acetate conversion (A) and acetaldehyde selectivity (B), and the  $r_{\text{CO}_2}$  value (C) of the  $\epsilon\text{-MnO}_2$  sample under the UV-Vis-IR irradiation with different light intensities.

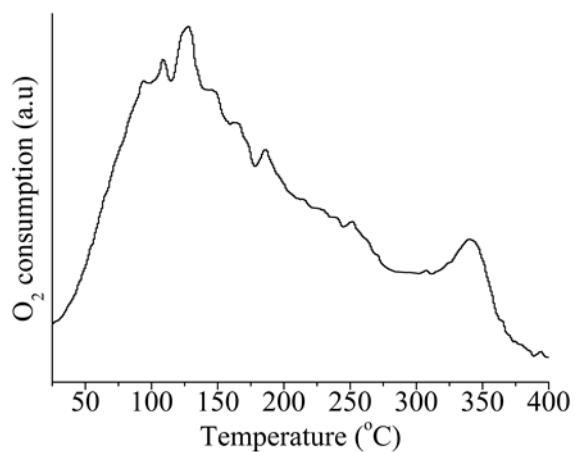

**Figure S4.** The O<sub>2</sub>-TPO profile of the ε-MnO<sub>2</sub> sample pre-reduced by CO at 170 °C.

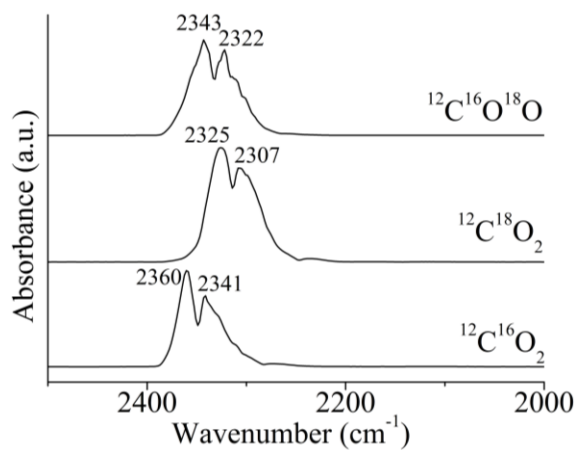

**Figure S5.** FTIR spectra of pure gases of <sup>12</sup>C<sup>16</sup>O<sub>2</sub>, <sup>12</sup>C<sup>18</sup>O<sub>2</sub>, and <sup>12</sup>C<sup>16</sup>O<sup>18</sup>O prepared by the oxidation of <sup>12</sup>C<sup>16</sup>O by <sup>18</sup>O<sub>2</sub> on 1.0 wt% Pt/Al<sub>2</sub>O<sub>3</sub>.

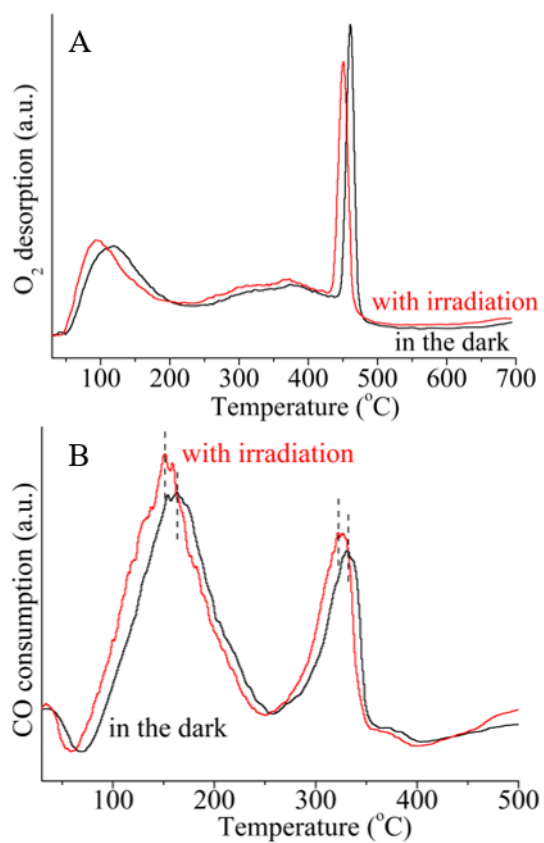

**Figure S6.** The O<sub>2</sub>-TPD profiles of the  $\epsilon$ -MnO<sub>2</sub> sample in the dark or with the UV-vis-IR irradiation (A). The CO-TPR profile of the  $\epsilon$ -MnO<sub>2</sub> sample without adsorbed oxygen species in the dark or with the UV-vis-IR irradiation (B).
